# Supplementary material
Source: publisher figshare collection journal article supplement (https://acs.figshare.com/ndownloader/files/14019302)
Supplement: Supplementary file 1 [file 14019302]

Compound_ID	SMILES
29	OC[C@H]1O[C@@H](OC2=CC=CC=C2C3=CC(C(O)=O)=CC([N+]([O-])=O)=C3)[C@H](NC(C)=O)[C@@H](O)[C@H]1O
30	OC[C@H]1O[C@@H](OC2=CC=CC=C2C3=CC(C(O)=O)=CC([N+]([O-])=O)=C3)[C@H](O)[C@@H](O)[C@H]1O
31	OC[C@H]1O[C@@H](OC2=CC=CC=C2C3=CC(C(O)=O)=CC=C3OC)[C@H](NC(C)=O)[C@@H](O)[C@H]1O
32	OC[C@H]1O[C@@H](OC2=CC=CC=C2C3=CC(O)=CC=C3)[C@H](NC(C)=O)[C@@H](O)[C@H]1O
33	OC[C@H]1O[C@@H](OC2=CC=CC=C2C3=CC(OS(=O)(C)=O)=CC=C3)[C@H](NC(C)=O)[C@@H](O)[C@H]1O
34	OC[C@H]1O[C@@H](OC2=CC=CC=C2C3=CC(O)=CC=C3OC)[C@H](NC(C)=O)[C@@H](O)[C@H]1O
35	OC[C@H]1O[C@@H](OC2=CC=CC=C2C3=CC(OS(=O)(C)=O)=CC=C3OC)[C@H](NC(C)=O)[C@@H](O)[C@H]1O
36	OC[C@H]1O[C@@H](OC2=CC=CC=C2C3=CC(F)=CC=C3)[C@H](NC(C)=O)[C@@H](O)[C@H]1O
37	OC[C@H]1O[C@@H](OC2=CC=CC=C2C3=CC(OC)=CC=C3)[C@H](NC(C)=O)[C@@H](O)[C@H]1O
38	OC[C@H]1O[C@@H](OC2=CC=CC=C2C3=CC([N+]([O-])=O)=CC=C3)[C@H](NC(C)=O)[C@@H](O)[C@H]1O
39	OC[C@H]1O[C@@H](OC2=CC=CC=C2C3=CC(C#N)=CC=C3)[C@H](NC(C)=O)[C@@H](O)[C@H]1O
40	OC[C@H]1O[C@@H](OC2=CC=CC=C2C3=CC(C(F)(F)F)=CC=C3)[C@H](NC(C)=O)[C@@H](O)[C@H]1O
41	OC[C@H]1O[C@@H](OC2=CC=CC=C2C3=CC(S(=O)(C)=O)=CC=C3)[C@H](NC(C)=O)[C@@H](O)[C@H]1O
42	OC[C@H]1O[C@@H](OC2=CC=CC=C2C3=CC(CO)=CC=C3)[C@H](NC(C)=O)[C@@H](O)[C@H]1O
43	OC[C@H]1O[C@@H](OC2=CC=CC=C2C3=CC(NC(C)=O)=CC=C3)[C@H](NC(C)=O)[C@@H](O)[C@H]1O
44	OC[C@H]1O[C@@H](OC2=CC=CC=C2C3=CC(NC(C(F)(F)F)=O)=CC=C3)[C@H](NC(C)=O)[C@@H](O)[C@H]1O
45	OC[C@H]1O[C@@H](OC2=CC=CC=C2C3=CC(NC(OC)=O)=CC=C3)[C@H](NC(C)=O)[C@@H](O)[C@H]1O
46	OC[C@H]1O[C@@H](OC2=CC=CC=C2C3=CC(C(N(C)C)=O)=CC=C3)[C@H](NC(C)=O)[C@@H](O)[C@H]1O
47	OC[C@H]1O[C@@H](OC2=CC=CC=C2C3=CC(C(NC)=O)=CC=C3)[C@H](NC(C)=O)[C@@H](O)[C@H]1O
48	OC[C@H]1O[C@@H](OC2=CC=CC=C2C3=CC(C(N)=O)=CC=C3)[C@H](NC(C)=O)[C@@H](O)[C@H]1O
49	OC[C@H]1O[C@@H](OC2=CC=CC=C2C3=CC(NS(=O)(C(F)(F)F)=O)=CC=C3)[C@H](NC(C)=O)[C@@H](O)[C@H]1O
50	OC[C@H]1O[C@@H](OC2=CC=CC=C2C3=CC(NS(=O)(C)=O)=CC=C3)[C@H](NC(C)=O)[C@@H](O)[C@H]1O
51	OC[C@H]1O[C@@H](OC2=CC=CC=C2C3=CC(NS(=O)(C)=O)=CC=C3)[C@H](O)[C@@H](O)[C@H]1O
78	OC[C@H]1O[C@@H](OC2=CC=CC([N+]([O-])=O)=C2C3=CC(NS(=O)(C)=O)=CC=C3)[C@H](NC(C)=O)[C@@H](O)[C@H]1O
79	OC[C@H]1O[C@@H](OC2=CC=CC(C#N)=C2C3=CC(NS(=O)(C)=O)=CC=C3)[C@H](NC(C)=O)[C@@H](O)[C@H]1O
80	OC[C@H]1O[C@@H](OC2=CC=CC(F)=C2C3=CC(NS(=O)(C)=O)=CC=C3)[C@H](NC(C)=O)[C@@H](O)[C@H]1O
81	OC[C@H]1O[C@@H](OC2=CC=CC(C(OCC3=CC=CC=C3)=O)=C2C4=CC(NS(=O)(C)=O)=CC=C4)[C@H](NC(C)=O)[C@@H](O)[C@H]1O
82	OC[C@H]1O[C@@H](OC2=CC=CC(C(O)=O)=C2C3=CC(NS(=O)(C)=O)=CC=C3)[C@H](NC(C)=O)[C@@H](O)[C@H]1O
83	OC[C@H]1O[C@@H](OC2=CC=CC(OC)=C2C3=CC(NS(=O)(C)=O)=CC=C3)[C@H](NC(C)=O)[C@@H](O)[C@H]1O
84	OC[C@H]1O[C@@H](OC2=CC=CC(C)=C2C3=CC(NS(=O)(C)=O)=CC=C3)[C@H](NC(C)=O)[C@@H](O)[C@H]1O
85	OC[C@H]1O[C@@H](OC2=CC=C(C=CC=C3)C3=C2C4=CC(NS(=O)(C)=O)=CC=C4)[C@H](NC(C)=O)[C@@H](O)[C@H]1O
86	OC[C@H]1O[C@@H](OC2=CC=CC(C)=C2C3=CC(NS(C4CC4)(=O)=O)=CC=C3)[C@H](NC(C)=O)[C@@H](O)[C@H]1O
87	OC[C@H]1O[C@@H](OC2=CC=CC(C)=C2C3=CC(NS(=O)(N(C)C)=O)=CC=C3)[C@H](NC(C)=O)[C@@H](O)[C@H]1O
88	OC[C@H]1O[C@@H](OC2=CC=CC(C)=C2C3=CC(NS(=O)(C)=O)=CC=C3)[C@H](/N=C(C(F)(F)F)/O)[C@@H](O)[C@H]1O
89	OC[C@H]1O[C@@H](OC2=CC=CC(C)=C2C3=CC(NS(=O)(C)=O)=CC=C3)[C@H](NS(C)(=O)=O)[C@@H](O)[C@H]1O
90	OC[C@H]1O[C@@H](OC2=CC=CC(C(F)(F)F)=C2C3=CC(NS(=O)(C)=O)=CC=C3)[C@H](NC(C)=O)[C@@H](O)[C@H]1O
